# Supplementary material for: Comparison of response to Chinese and Western videos of mental-health-related emotions in a representative Chinese sample
Source: PeerJ journal article supplement (doi:10.7717/peerj.10440), 2021-01-19
Supplement: Supplemental_Table_S1_revised.docx [file Supplemental_Table_S1_revised.docx]

| No. | Culture | Emotion category | Source | Video name | Description |
| --- | --- | --- | --- | --- | --- |
| 1 | Chinese | Happiness | Film | Lost on Journey | A young man from the countryside takes a flight for the first time. A series of embarrassments happen. For example, unwilling to throw away a large bucket of milk, he drinks it all at the security check. |
| 2 | Chinese | Happiness | Film | Crazy Alien | Two people are drinking with an alien and make a scene. When a police officer come to intervene, they try to fool him around. |
| 3 | Chinese | Happiness | Real-life video | Chinese Baby | A lovely Chinese baby girl wakes up in the crib, self-soothing and making big smiles. |
| 4 | Western | Happiness | Film | The Dinner Game | “Complex humoristic scene” (Shcaefer et al., 2010). |
| 1 | Chinese | Sadness | Film | Tangshan Earthquake | In the rubbles of the earthquake, two children are covered by the same big slate. With the manual leveling rescue method, only one child can be saved. The mother has to decide which child to save. |
| 2 | Chinese | Sadness | Real-life video | Life Matters -A Mother with Cancer | A mother with terminal cancer talks about her plan to record 18 birthday videos for her newborn baby. |
| 3 | Chinese | Sadness | Film | Get Lost, Mr. Tumor | A young girl with terminal cancer is having a heart-felt conversation with her mother. |
| 4 | Western | Sadness | Film | Schindler's List | “Dead bodies are being carried away in a concentration camp” (Shcaefer et al., 2010). |

**S1 Table: Descriptions of videos (by emotion category).**

(continued)

| No. | Culture | Emotion category | Source | Video name | Description |
| --- | --- | --- | --- | --- | --- |
| 1 | Chinese | Anger | Film | City of Life and Death | In the background of the Sino-Japanese war, thousands of Chinese are forced to kneel on the ground, and then shot to death by Japanese soldiers. |
| 2 | Chinese | Anger | Real-life video | Indifferent Bystanders | A surveillance camera captured the process in which a young woman was hit by a car and lying on the crosswalk. With no help from passing pedestrians, she was run over by another car. |
| 3 | Chinese | Anger | Film | Angels Wear White | A mother beats her young daughter up. |
| 4 | Western | Anger | Film | American History X | “A neo-Nazi (played by Edward Norton) kills an African-American man, smashing his head on the curb” (Shcaefer et al., 2010). |
| 1 | Chinese | Fear | Film | The Great Hypnotist | Two people are hiding in a dark room. A woman is searching for them outside the room. |
| 2 | Chinese | Fear | Real-life video | Tornado | A documentary captures the effects of tornados. Cars and planes are lifted into the air when the tornado passes by. |
| 3 | Chinese | Fear | Film | The Meg | A little girl is playing with an electric car in an undersea tunnel. Suddenly she sees a megalodon and it crashes the glass of the tunnel. |
| 4 | Western | Fear | Film | Scream | “A girl receives threats over the phone” (Shcaefer et al., 2010). |

(continued)

| No. | Culture | Emotion category | Source | Video name | Description |
| --- | --- | --- | --- | --- | --- |
| 1 | Chinese | Awe | Real-life video | Parade | The parade marked the 70th anniversary of the victory of the Chinese war of resistance against Japanese aggression. |
| 2 | Chinese | Awe | Film | Dong Cunrui | The scene depicting the Chinese national hero during the Civil War, Dong Cunrui, uses his body as the holdup for explosives to bomb a critical bunker of the enemy. |
| 3 | Chinese | Awe | Real-life video | Changing Sky | A sweeping shot of changing sky, from sunrise to sunset, taken from the top of the mountains. |
| 1 | Chinese | Neutrality | Real-life video | Driver’s View | A driver's view of the road when driving on a highway. |
| 2 | Chinese | Neutrality | Real-life video | Pot Manufacturing | The streamline process of making iron pots in a factory. |
